# Supplementary material for: Evaluating the transport of surface seawater from 1956 to 2021 using 137 Cs deposited in the global ocean as a chemical tracer
Source: Copernicus journal article supplement (doi:10.5194/essd-2022-374), 2022-11-28
Supplement: Supplementary file [file essd-2022-374-AC4-supplement.pdf]

Dear Reviewer (Citation: <https://doi.org/10.5194/essd-2022-374-RC1>)

Thank you very much for your valuable comments. Taking into account your comments, I modified the manuscript as follows.

- Please, correct the UNSCEAR quote which is incorrect in almost all of the text.

A. I modified the term of “UNSCEAR”.

- line 1850 Papucci, C., Salvi, S., Lorenzelli R.

A. Delfanti, R., Papucci, C., Salvi, S., Lorenzelli R.: IAEA CRP "Worldwide Marine Radioactivity". Research Contract - Agreement No. ITA-26803, ENEA, Italy, 2000.

- line 1857 Papucci

A. Delfanti, R., Özsoy, E., Kaberi, H., Schirone, A., Salvi, S., Conte, F., Tsabaris, C., and Papucci C : Evolution and fluxes of  $^{137}\text{Cs}$  in the Black Sea/Turkish Straits System/North Aegean Sea. J. Mar. Systems. 135, 117–123, 2014.

- please, define tap in a more explicit way: apparent half-life

The regression line of the 0.5-yr median value of  $^{137}\text{Cs}$  for each box was determined and apparent half residence time (Tap) due to the radioactive decay and ocean physical processes were estimated.

The Tap of  $^{137}\text{Cs}$  was calculated using the following equations:

$$^{137}\text{Cs} = ^{137}\text{Cs}_0 \exp(-\lambda_{\text{Cs, apparent}}) \quad (1)$$

$$\lambda_{\text{Cs, apparent}} = \lambda_{\text{Cs, ocean}} + \lambda_{\text{Cs, decay}} \quad (2)$$

$$\text{Tap} = 0.693 / (\lambda_{\text{Cs, apparent}}) \quad (3)$$

$$\text{Tpo} = 0.693 / (\lambda_{\text{Cs, ocean}}) \quad (4)$$

where  $\lambda_{\text{Cs, apparent}}$ ,  $\lambda_{\text{Cs, ocean}}$ , and  $\lambda_{\text{Cs, decay}}$  are the decay constants for apparent decay, physical oceanographic decay, and radioactive decay, respectively.  $\lambda_{\text{Cs, apparent}}$  is estimated by using the regression line of the 0.5-yr median value of  $^{137}\text{Cs}$  as shown in (1). Tpo is the apparent half residence time by causing the oceanic physical processes and  $\lambda_{\text{Cs, ocean}}$  was estimated  $\lambda_{\text{Cs, apparent}}$  and  $\lambda_{\text{Cs, decay}}$  in equation (2). Considering that the half-life of  $^{137}\text{Cs}$  ( $T_{1/2}$ ) is 30.17 years, the Tap should be shorter than the half-life if no source of  $^{137}\text{Cs}$  exists in the region of interest. A shorter Tap means that  $^{137}\text{Cs}$  is removed quickly in the area and/or the  $^{137}\text{Cs}$  inflow amount is small in the area compared with the  $^{137}\text{Cs}$  outflow amount. In other words, a Tap shorter than the radioactive decay time indicates that the

variations in the  $^{137}\text{Cs}$  activity concentrations are strongly controlled by physical ocean processes. In contrast, a longer Tap as well as a negative Tpo value means that  $^{137}\text{Cs}$  is preserved in the region for a longer time and/or there is an influx of water mass with higher  $^{137}\text{Cs}$  in the region compared to the  $^{137}\text{Cs}$  outflow from the region.

- please, define the start of half year because layering could affect the mixed layer

In Table 3, the start and end year for estimate Tap were described.

|      |                                         | Start  | End    | Tap  | Tpo    |
|------|-----------------------------------------|--------|--------|------|--------|
| Tap  | western North Pacific Ocean             | 1970   | 2010   | 15.0 | 29.9   |
|      | Eastern China Sea                       | 1970   | 2010   | 17.7 | 42.8   |
|      | Japan Sea                               | 1970   | 2010   | 16.4 | 35.9   |
| Tap1 | subarctic North Pacific Ocean           | 1957.5 | 1969.5 | 8.6  | 12.1   |
|      | western subtropical North Pacific Ocean | 1957   | 1970   | 4.3  | 5.0    |
|      | western equatorial Pacific Ocean        | 1960.5 | 1966.5 | 52.0 | -71.8  |
|      | eastern equatorial Pacific Ocean        | 1963.5 | 1969.5 | 5.8  | 7.2    |
|      | eastern subtropical South Pacific Ocean | 1966   | 1970   | 6.0  | 7.5    |
| Tap2 | subarctic North Pacific Ocean           | 1970.5 | 1984.5 | 9.6  | 14.0   |
|      | eastern North Pacific Ocean             | 1970.5 | 1985   | 8.8  | 12.4   |
|      | western subtropical North Pacific Ocean | 1970   | 1989   | 34.1 | -260.7 |
|      | Indonesian Archipelago                  | 1973   | 1997   | 36.7 | -169.2 |
| Tap3 | subarctic North Pacific Ocean           | 1990.5 | 2009.5 | 18.2 | 45.8   |
|      | Sea of Okhotsk                          | 1992   | 2010   | 24.0 | 117.0  |
|      | western subtropical North Pacific Ocean | 1990   | 2011   | 25.2 | 153.0  |
|      | western equatorial Pacific Ocean        | 1992   | 2003   | 15.6 | 32.5   |
|      | Indonesian Archipelago                  | 1973   | 1997   | 36.7 | -169.2 |
|      | Baltic Sea                              | 1990   | 2017   | 11.5 | 18.6   |
|      | North Atlantic Ocean                    | 1992   | 2017   | 21.3 | 72.3   |
|      | Central Atlantic Ocean                  | 1992   | 2016   | 38.0 | -146.5 |
|      | South Atlantic Ocean                    | 1994   | 2013.5 | 15.4 | 31.4   |

- Correct the follow figure:
- fig 1 (a-b) unreadable labels and coordinates

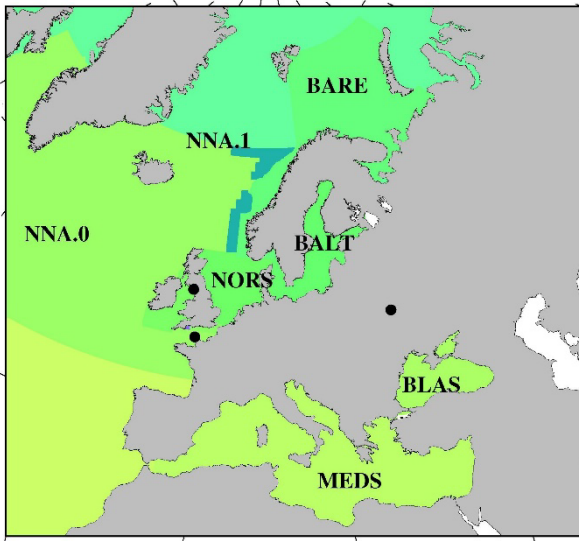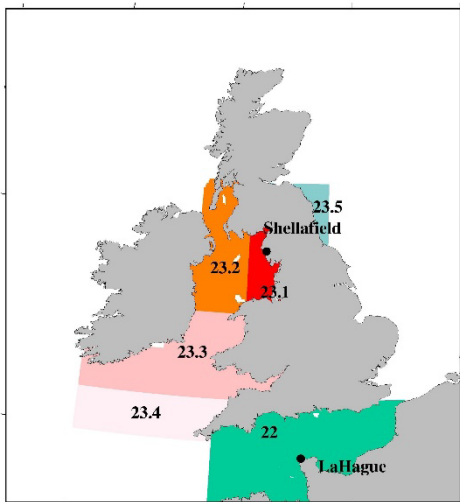

● fig 2 label, Mediterranean

A. The spell of Mediterranean Sea is modified as follows.

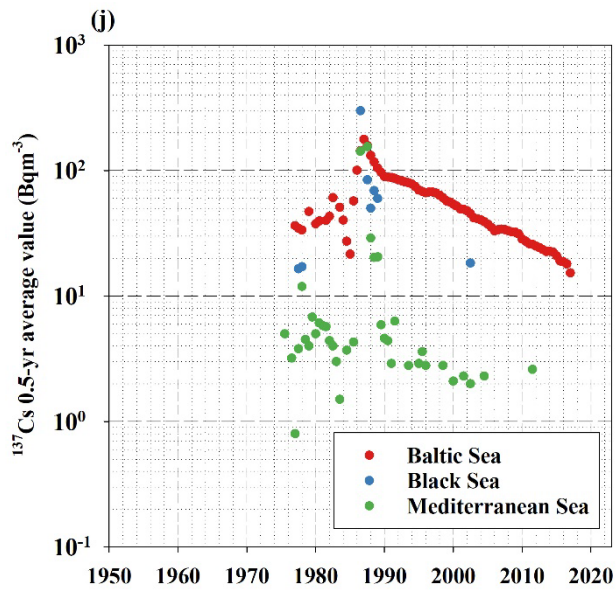

● fig 5 b unreadable coordinates

Fig 5b was modified as follows.

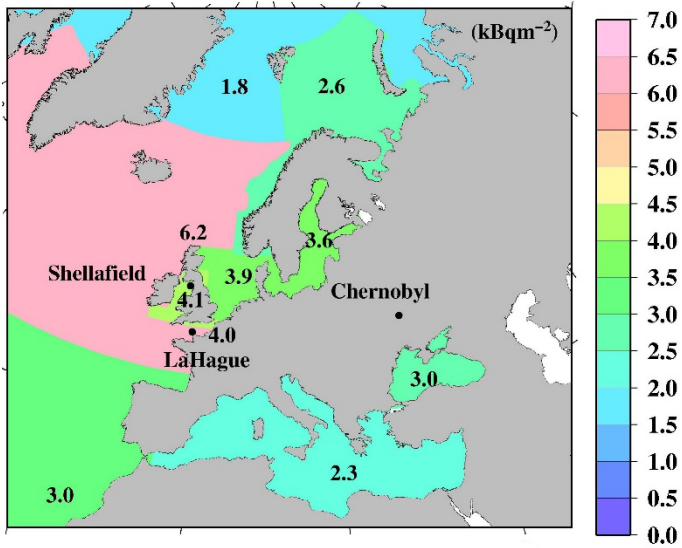

- fig 6 b unreadable coordinates

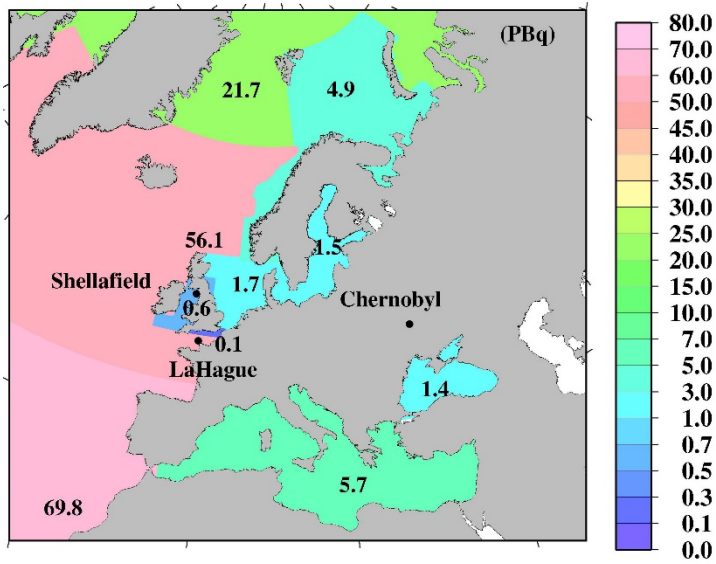

- fig 7 (a-j) unreadable label

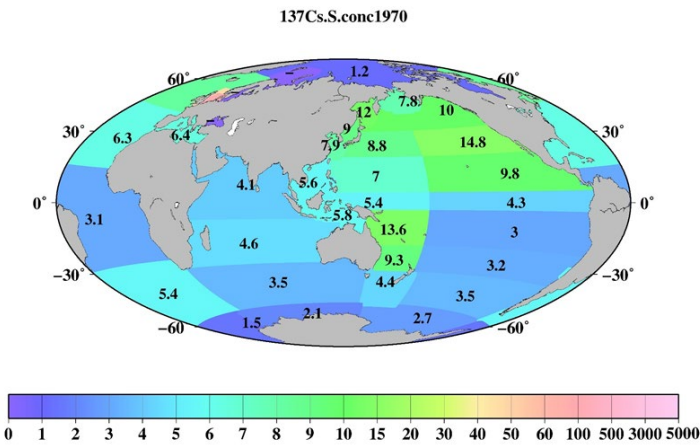

- fig 8 (a-j) unreadable coordinates

1970

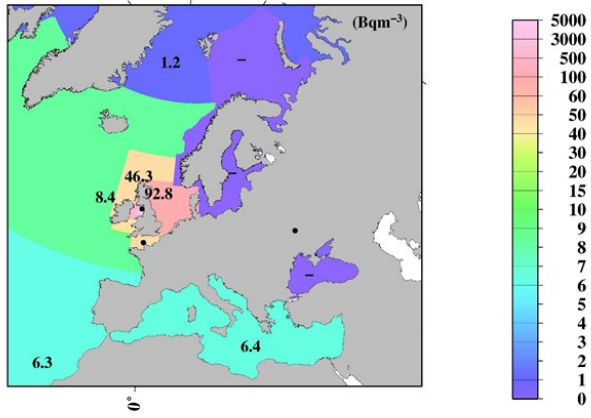

- fig 10 (a b) unreadable coordinates

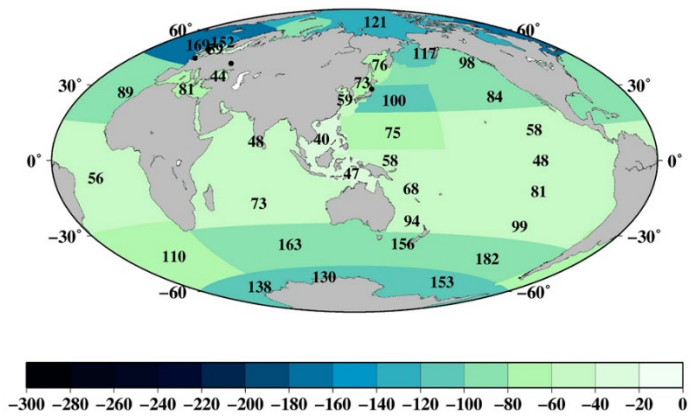

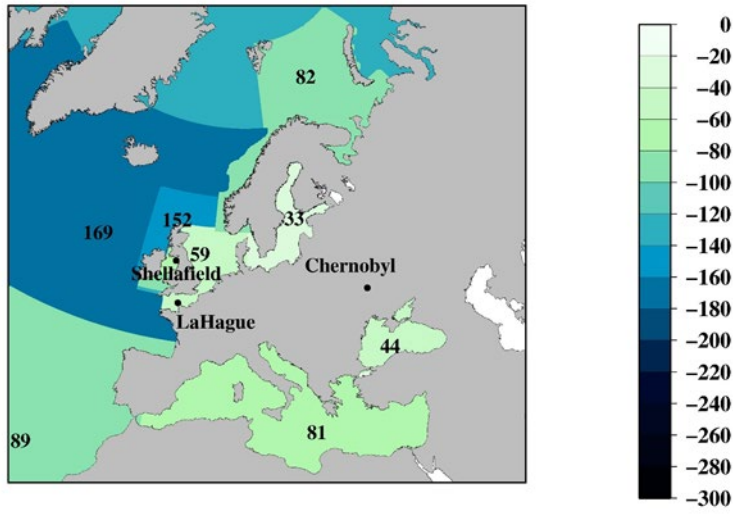

- fig 12 (a-j) unreadable labels and coordinates

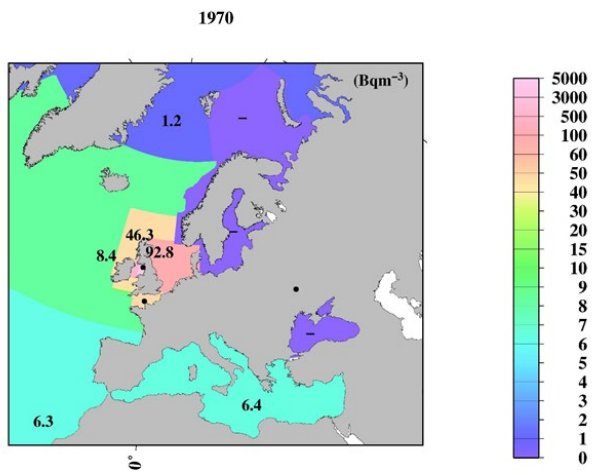

- fig 18 (b) unreadable coordinates

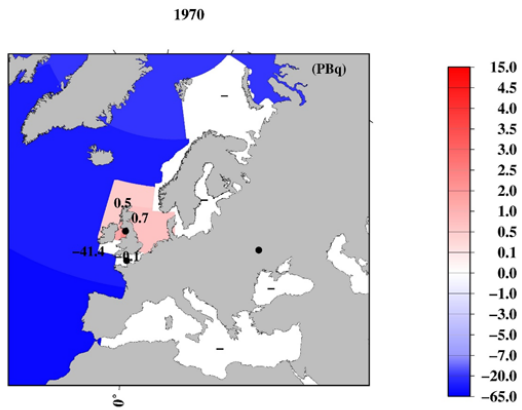

- fig 19 (a-i) unreadable label

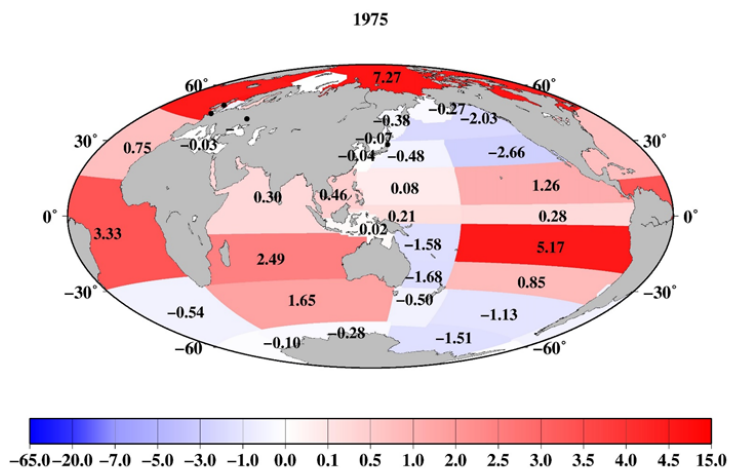

- fig 20 (a-i) unreadable coordinates



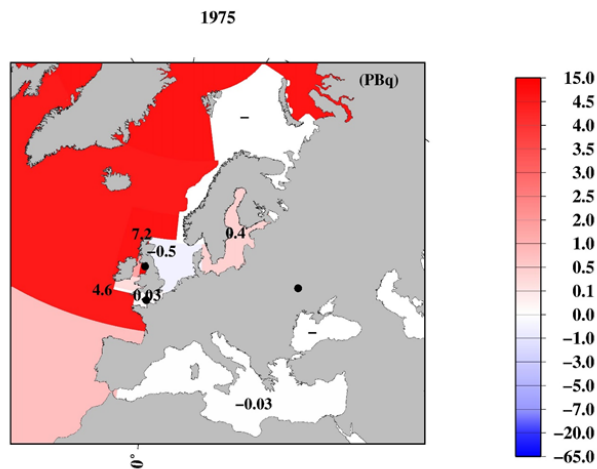

- line 480

the value that is almost equal to the value before Chernobyl accident demonstrates the importance of increased release from the rivers flowing through the area affected by the accident: in fact, in Mediterranean Sea, where this input is negligible, the value in 2002 were less than half pre-Chernobyl accident.

Thank you very much for your comments. The importance of  $^{137}\text{Cs}$  inflow into the Black Sea from the rivers were added in the manuscript.

The 0.5-yr median value of  $^{137}\text{Cs}$  in the Black Sea (Box 26) in 1977 and 1978.5 was approximately  $17 \text{ Bq m}^{-3}$ , and in 1986, it increased to  $299 \text{ Bq m}^{-3}$ , which was at least 18 times higher than that before the Chernobyl accident (Fig. 2j). The 0.5-yr median value of  $^{137}\text{Cs}$  decreased rapidly to  $60 \text{ Bq m}^{-3}$  in 1989. The 0.5-yr median  $^{137}\text{Cs}$  value in 2002 was almost equal ( $18.3 \text{ Bq m}^{-3}$ ) to that before the Chernobyl accident. The rapid decrease in surface  $^{137}\text{Cs}$  could be due to the strong intrusion of surface waters to the deep layers,  $^{137}\text{Cs}$  inflow into the Mediterranean Sea after passing through the Bosphorus Strait, and radioactive decay (Egorov, 1999; Delfanti et al., 2014). However, Black Sea continues to receive  $^{137}\text{Cs}$  derived from Chernobyl by the runoff from rivers (Gulin et al., 2013).
